# Supplementary material for: 2017 American Neuropsychiatric Association Annual Meeting Abstracts
Source: Atypon-hosted journal article supplement (doi:10.1176/appi.neuropsych.16110299), 2017-07-01
Supplement: appi.neuropsych.16110299.ds001.pdf [file appi.neuropsych.16110299.ds001.pdf]

# ABSTRACTS

Presented at the 28<sup>th</sup> Annual Meeting of the  
**American Neuropsychiatric Association**

March 8 – 11, 2017  
The Westin Buckhead Atlanta

*Atlanta, Georgia*

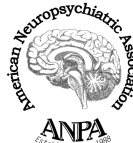

## ANPA Executive Committee

### President

John J. Campbell, MD, FANPA

### Immediate Past President

Jeremy D. Schmahmann, MD, FANPA

### President Elect

Robin Hurley, MD, FANPA

### Treasurer

C. Edward Coffey, MD, FANPA

## ANPA Scientific Program Committee Members and Reviewers

### Chair: Kaloyan Tanev, MD, FANPA

Kevin Black, MD, FANPA

Joan Camprodon, MD, PhD

Omar Ghaffar, MD, MSc, FRCPC, FANPA

Robin Hurley, MD, FANPA

Daniel Kaufer, MD, FANPA

Richard Ronan Murphy, MD

Jeremiah Scharf, MD, PhD

Katherine Taber, PhD, FANPA

## Awards Presented at the 2017 Annual Meeting

### **Fellow of the American Neuropsychiatric Association**

The designation of Fellow of the American Neuropsychiatric Association recognizes significant contributions to the field of neuropsychiatry, behavioral neurology, neuropsychology or the clinical neurosciences and to the Association.

**The individual elected as a Fellow of ANPA in 2017 is:**

Andrea E. Cavanna, MD, PhD, FRCP

### **ANPA Career Development Award**

The ANPA Career Development Award Program recognizes an advanced trainee in neuropsychiatry, behavioral neurology or neuropsychology whose accomplishments during training offer promise of a successful career in neuropsychiatry and the clinical neurosciences.

**The Career Development Award 2017 awardee:**

Kahled Moussawi, MD, PhD

### **ANPA Young Investigator Awards**

The ANPA Young Investigator Award recognizes early trainees who are embarking on promising careers in the clinical neurosciences. The recipients are chosen from the submitted presentations at the Annual Meeting. The decisions are based on the quality of the abstract submission and, more broadly, the candidate's perceived ability to make a contribution to the field with the encouragement and support provided by the award.

**The Young Investigator 2017 awardees:**

Ryan Darby, MD

Ana Margarita Rodriguez Salgado, MD

### **ANPA Clinical Neuroscience Trainee Award**

ANPA Clinical Neuroscience Trainee Award recognizes an outstanding trainee with special accomplishments or involvement in the clinical neurosciences. This award was designed to facilitate early involvement in ANPA by highly motivated residents in psychiatry or neurology, considering careers in neuropsychiatry or behavioral neurology, or doctoral candidates considering careers in neuropsychology.

**The Clinical Neuroscience Trainee 2017 awardee:**

Shan H. Siddiqi, MD

Full text of the abstracts presented at the Meeting accompanies the online edition of the summer 2017 issue, at <http://neuro.psychiatryonline.org>. The abstracts can be cited in the same format:

Author name(s): Title of abstract, in Abstracts Presented at the 28th Annual Meeting of the American Neuropsychiatric Association. *J Neuropsychiatry Clin Neurosci* 2017; 29(3):e1-e32

- P1. Catatonia-Like Behavior: A Dimensional Approach** *Janette Abramowitz, Sheldon Benjamin*
- P2. Delusional Misidentification of Self in a Patient With Schizophrenia and Traumatic Head Injury** *Dorcas Adaramola, Jeffrey Bennett, Hitekshya Nepal*
- P3. Chronic Nitrous Oxide Use and Seasonal Affective Disorder** *M. Al Sayyab, N. Sondhi, B. Deras, A.R. Hirsch*
- P4. The Relationship Between Carotid Atherosclerosis, Cerebral Cortex Thickness and Cognition in Community-Dwelling Older Adults** *Saud Alhusaini, Sherif Karama, Mark E. Bastin, Joanna M. Wardlaw, Ian J. Deary, Simon Ducharme*
- P5. Resting-State Functional Connectivity of the Anterior Cingulate Cortex in Mood Disorder Patients With and Without Suicide-related Behaviors** *Elisa Ambrosi, David B. Arciniegas, Kaylah N. Curtis, Ricardo E. Jorge, J. Christopher Fowler, B. Christopher Frueh, Alok Madan, Ramiro Salas*
- P6. A Case of Anti-NMDA Receptor Encephalitis Mistaken for Non-Epileptic Seizures** *J.R. Anderson, S.J. Ridout*
- P7. Utility of the 5-Minute MoCA and In-Depth Screening of Cognitive Deficits in Acute Stroke** *Amelia J. Anderson-Mooney, Emily A. Justusson, Stacey L. Brothers, Jennifer Wells, Emily Downing, Mary Uber, Frederick A. Schmitt, R. Ronan Murphy*
- P8. Dysregulation of Stress Systems in Conversion Disorder** *Kalliopi Apazoglou, Viridiana Mazzola, Jennifer Wegrzyk, Selma Aybek*
- P9. Rapid Eye Movement Sleep Behavior Disorder and Posttraumatic Stress Disorder: Their Potential Overlap and Diagnostic Challenges** *Matthew Ayers, Melissa Jones, Ashley Woolbert, Laura Marsh, Ricardo Jorge*
- P10. HSV Encephalitis With Anti-NMDA Receptor Antibodies Presenting as Kluver Bucy Syndrome** *Talha John Baloch, Arindam Chakrabarty, Irfan Buzdar*
- P11. A Case Study of Catatonia: Where Atypical Is Typical** *James R. Bateman, Kathryn Moore, Daniel I. Kaufer*
- P12. Successful Suppression of Psychogenic Non-Epileptic Seizures Involves Theta Band Activation of the Right Frontal Cortex** *Shiri BenNaim, Rachel Shitrit, Sara Freedman, Dana Ekstein, Shahar Arzy, Renana Eitan*
- P13. A Proof-of-Concept Open-Label Trial of COMT Inhibition to Ameliorate Cognitive and Behavioral Sequelae of Traumatic Brain Injury** *Emily Berich, Alexander Maclay, Elizabeth Postell, Andrew E. Jaffe, Daniel R. Weinberger, Vassilis Koliatsos, Robert Schloesser, Margo Lauterbach*
- P14. Relationship Between NIH Toolbox Cognition Battery and Well-Established Neuropsychological Tests in a Veteran Sample** *Timothy Breaty, David Curry, Robert Shura, Jared Rowland, Katherine Taber*
- P15. Persistence of Effect of Dextromethorphan Hydrobromide/Quinidine Sulfate (DM/Q) for Pseudobulbar Affect (PBA): Results From a 12-Week Open-Label Extension (OLE) Study** *Benjamin Rix Brooks, Erik P. Pioro, Paul Shin, Ryan Law, Andrea E. Formella*
- P16. Altered Sense of Limb Ownership Resulting From a Left Parietal Meningioma** *Joanne A. Byars, Amy R. Corcoran, David B. Arciniegas*
- P17. Use Ankle Clonus to Identify Mild Serotonin Syndrome** *Shawn Cassidy, Maureen Cassidy*
- P18. Neuroscientific and Philosophical Theories of the Mind-Body Problem in Neuropsychiatry** *Andrea E. Cavanna*
- P19. Benzodiazepine Withdrawal Induced Myoclonus: Syndrome or Prodrome?** *Arindam Chakrabarty, Jeffrey Bennett*
- P20. Gustatory Sensory Additive Inhibition Induced Ageusia** *Namoshri J. Chaudhuri, Jennifer L. Wooden, Alan R. Hirsch*
- P21. A Case of Anti-NMDA Receptor Encephalitis Masked as a Psychotic Disorder** *Amanda H. Cook, Neil Pliskin, Moises Gaviria*
- P22. Catatonia Resulting From Hypoxic-Ischemic Brain Injury** *Amy R. Corcoran; Joanne A. Byars; David B. Arciniegas*
- P23. Making a Murderer: Connectivity of Brain Lesions Causing Immoral Behavior** *Ryan Darby, Michael Fox*
- P24. Comprehensive Tinnitus Care** *Adriana de Julio, Alessandro Biffi, Zeina Chemali*
- P25. Transient Splenial Lesions of the Corpus Callosum and Its Meaning in Neuropsychiatry** *Yazmin de la Garza-Neme, Carlos Paredes-Ceseña, Alejandro Sanjurjo-Martínez*
- P26. A Specific Cerebellar Peduncles Affection and Its Role in Cerebellar Cognitive Affective Syndrome: A Case Report** *Yazmin de la Garza-Neme, Carlos Paredes-Ceseña, Alejandro Sanjurjo-Martínez, Gloria Adame-Ocampo*
- P27. Visuoanatomical Disconnection Demonstrated by DTI MRI in Capgras Delusion** *Yazmin de la Garza-Neme, Carlos Paredes-Ceseña, Alejandro Sanjurjo-Martínez, Valente Cedillo*
- P28. Apathy Prevalence in Parkinson's Disease in Mexico City** *Yazmin de la Garza-Neme, Alejandro Sanjurjo-Martínez, Carlos Paredes-Ceseña, Isael Reyes-Melo*
- P29. Refractory Major Depression With Secondary Parkinsonism** *Elizabeth DeGrush, Naama Cohen, Leah Richler, Anindita Deb, Sheldon Benjamin*
- P30. Clinician Perceptions of Functional Neurological Symptom Disorder (FND): Outcome of a Cost-Effective Training Module** *Nazlie Faridi, Ariela Karasov, Kim Bullock, Juliana Lockman, John Barry, Sepideh N. Bajestan*

- P31. Research Trends in Gilles de la Tourette Syndrome in 2010–2015** *Agnieszka Felska, Andrea Cavanna*
- P32. The Expanding Differential Diagnosis of Toxic Leukoencephalopathy** *C.M. Filley, B.V. McConnell, C.A. Anderson*
- P33. Obsessive Compulsive and Phobic Symptoms in Epilepsy: Associated Factors and Impact on Quality of Life** *Luciana Giambarberi, Heidi Munger Clary, Marla Hamberger*
- P34. Blood-Brain Barrier and Autoantibodies in Alzheimer's Disease Pathogenesis, Progression, and Diagnosis** *Eric L. Goldwaser, Nimish K. Acharya, Robert G. Nagele*
- P35. Time and Again: Reduplicative Paramnesia for Events in Two Patients With Right Frontal Lobe Lesions** *Lindsey Gurin, Sonja Blum*
- P36. Gustatory Sensation: State Dependency** *J. Henao, J. Wooden, A. Hirsch*
- P37. Brexpiprazole Induced Parkinsonism** *J.L. Henao, S.B. Jaber, A.R. Hirsch*
- P38. Acute Onset Psychosis and Cognitive Impairment as Presenting Symptoms of MS** *Adam Hinzey, Katherine Brownlowe*
- P39. Teaching Materials to Assist in the Neuropsychiatric Investigation and Understanding of Poison Exposure Part II—Toxic Gases** *Robin A. Hurley, Katherine H. Taber*
- P40. Olanzapine Induced Chemosensory Hyperhedonics** *S.B. Jaber, B.L. Avonts, A.R. Hirsch*
- P41. POTS: An Underappreciated Mediating Factor in Psychiatric Symptoms and Treatment?** *Elizabeth Langmore-Avila, Stuart Anfang*
- P42. Clinico-Electrophysiologic Correlations in a Case of Refractory Aphasic Status Epilepticus** *Daniel J. Lee, Jennifer R. Lloyd, Jeffrey A. Loeb*
- P43. Drug-Induced Parkinsonism and Concurrent Hypothyroidism in an Elderly Patient with Chronic Lithium Use** *Soyoung Lee, Joanna C. Lim, Venkatesh D. Handratta*
- P44. EEG and Neuroimaging Abnormal Results as Predictors of Worse Outcome in Patients with Catatonia** *Joan Roig Llesuy, Michel Medina, Kristina Thurin, Joseph Cooper*
- P45. Blast Exposure as a Moderator in the Relationship between PTSD Symptoms and Sleep Quality in Iraq and Afghanistan Veterans** *S.L. Martindale, J.A. Rowland, K.H. Taber*
- P46. Neuropsychiatric Associations With Gender, Illness Duration and Work Disability Status in a U.S. Based Functional Neurological Disorders Clinic Population** *Nassim Matin, Sigrid S. Young, Benjamin Williams, W. Curt LaFrance, Jr., Julie N. King, David Caplan, Zeina Chemali, Jeffery B. Weilburg, Bradford C. Dickerson, David L. Perez*
- P47. Mood Disorder and Functional Movement Disorder in a 38-Year-Old Man following Laser Ablation for Temporal Lobe Epilepsy** *Ruth McCann, Deepti Anbarasan, Hyunmi Choi, Sameer Sheth*
- P48. Development of an Automated System to Apply Transcranial Alternating Current Stimulation for Modulation of Sleep** *Brice McConnell, Peter Teale, Eugene Kronberg, Benzi Kluger*
- P49. Clinical Utility of the Clock Drawing Test in NMDAR Encephalitis Presenting with Refractory Catatonia Responsive to ECT** *Michel Medina, Kristina Thurin, Joan Roig Llesuy, Joseph Cooper*
- P50. Introduction to Progressive Muscle Relaxation Therapy for Migraine in the Emergency Department: A Pilot Feasibility Study** *Mia Minen, Alexandra Boubour, Scott Powers, Corita Grudzen, Richard Lipton*
- P51. Distress Tolerance and Symptom Severity Mediate Failure on a Symptom Validity Test in Iraq and Afghanistan Veterans With PTSD** *H.M. Miskey, S.L. Martindale, R.D. Shura, K.H. Taber*
- P52. A 33-Year-Old Man With Focal and Diffuse Neuropsychiatric Signs but Non-Focal Brain Imaging: A Systematic Approach to Diagnosis** *Khaled Moussawi, Taha Gholipour, Haatem Reda, Vani Rao*
- P53. Initial Validity of the Lexington Acute Stroke Scale—Inpatient (LASS-I) as Compared with Established Measures of Stroke Severity and Disability** *R. Ronan Murphy, Frederick A. Schmitt, Stacey L. Brothers, Jennifer L. Wells, Emily C. Downing, Mary M. Uber, Emily A. Justusson, Amelia J. Anderson-Mooney*
- P54. Case Report: Infectious Trigger for Psychosis Treated With Intravenous Immunoglobulins and Azithromycin** *Tanya K. Murphy, Erin M. Brennan, J. Zachary Allen*
- P55. Psychosis as the Initial Presentation of Multiple Sclerosis in a State Psychiatric Hospital** *Amy Newhouse, Nabil Ali*
- P56. A Case of Attention Deficit Hyperactive Disorder Complicated With Three Other Co-morbidities That Risperidone-LAI Was Effective in Controlling Impulsivity** *Kengo Oishi, Masaki Tamura, Ayumi Okato, Tsutomu Kurata, Yu Kamata, Tsuyoshi Sasaki, Masaomi Iyo*
- P57. Endocannabinoid, Dopaminergic, Neuromodulatory Interactions Observed in Patient Treated With Complex Pharmacotherapy** *Jesse Oler, Phillip Epstein*
- P58. Cingulo-Insular Structural Alterations Associated With Psychogenic Symptoms, Childhood Abuse and PTSD in Functional Neurological Disorders** *David L. Perez, Nassim Matin, Arthur Barsky, Victor Costumero-Ramos, Sara J. Makaretz, Sigrid S. Young, Jorge Sepulcre, W. Curt LaFrance, Jr., Matcheri S. Keshavan, Bradford C. Dickerson*
- P59. Traumatic Brain Injury in Individuals 65 and Older: Differences Between Young and Old in Demographics, Injury Characteristics, and One-Month Outcomes** *Matthew Peters, Vani Rao, Durga Roy, Kathleen Kortte, Haris Sair, Jeannie-Marie Leoutsakos, Tim Van Meter, Hayley Falk, Uju Ofoche, A.J. Hall, Braden Anderson, Freshta Akbari, Olivia Lardo, Constantine Lyketsos, Frederick Korley*

- P60. The Efficacy of Transcranial Magnetic Stimulation in the Treatment of Psychogenic Non-Epileptic Seizures** *Krystyna Peterson, Robert Kosior, Benjamin P. Meek, Marcus Ng, David L. Perez, Mandana Modirrousta*
- P61. Symptom Validity—Implications for Suicide Risk Assessment and Management** *Erin K. Poindexter, Lindsey Monteith, Sarra Nazem, Bridget Matarazzo, Hal Wortzel*
- P62. Adolescent Ceneathopathy: A Case Report and Discussion of Neurobiological Mechanisms of Somatic Misperceptions** *Geoffrey Raynor*
- P63. Disgusting Taste Without Gustatory Distortion** *Robert Reid, Alan Hirsch*
- P64. Vortioxetine Induced Glycolimia** *R.G. Reid, A.R. Hirsch*
- P65. Hypnosis for the Treatment of Psychogenic Speech and Voice Disorders: A Case Report and Review of Neural Circuits Implicated in Hypnosis** *Anna F. Rief, Sepideh N. Bajestan, John J. Barry*
- P66. Behavioral and Psychological Symptoms in Elderly Patients With Dementia: A 5 Years Cohort Follow Up** *Ana Rodriguez Salgado, Jorge Llibre*
- P67. Performance Validity and Symptom Validity Tests Measure Distinct Constructs** *J.A. Rowland, R.D. Shura, S.L. Martindale, K.H. Taber*
- P68. Serum Resistin Mediates Depression's Effect on Cognition** *Safa Rubaye, Donald R. Royall, Raymond F. Palmer*
- P69. American Neuropsychiatric Association (ANPA) Membership Survey: Preliminary Results** *Jay Salpekar, Richard Cowles, Barbara Schildkrout, Margo Lauterbach*
- P70. Professional Interests among American Neuropsychiatric Association (ANPA) Members Differ Depending Upon Time of Joining and Tenure in the Organization** *Jay Salpekar, Richard Cowles, Barbara Schildkrout, Margo Lauterbach*
- P71. Affective Disorders: Misdiagnosis or a Prodromal State of Frontotemporal Dementia?** *Alejandro Sanjurjo-Martinez, Carlos Augusto Paredes-Ceseña, Yazmin de la Garza-Neme*
- P72. The Diagnostic Significance of a Mental Status Examination in a Patient with Possible Chronic Traumatic Encephalopathy** *Hadia Shafi, Zainab Malik, Nabil Ali*
- P73. Intelligence and Possible Attention-Deficit/Hyperactivity Disorder (ADHD) as Risk Factors for Posttraumatic Stress Disorder (PTSD) in Veterans** *R.D. Shura, S.L. Martindale, T.W. Brearly, J.A. Rowland, K.H. Taber*
- P74. Olfactory Fenestra and Prednisone: Epochs of Cranial Nerve I Response to Prednisone** *A. Siddiqui, A.R. Hirsch*
- P75. Phantochemesthesia—A Novel Expression of Temporal Lobe Epilepsy** *Samreen Siddiqui, Alan Hirsch*
- P76. Temporal Summation of Olfactory Stimuli Triggers Gustatory Chemesthesia** *Samreen Siddiqui, Alan Hirsch*
- P77. 3D Statistical Mapping of Variable Affective/Cognitive Effects of Various DBS Stimulation Sites in Parkinson Disease** *Shan Siddiqi, Jonathan Koller, Tamara Hershey, Kevin Black*
- P78. Individualized Connectome Mapping to Target rTMS for Treatment-Resistant Depression in Traumatic Brain Injury** *S.H. Siddiqi, N.T. Trapp, S. Kandala, C.D. Hacker, X. Hong, A.C. Carter, D.L. Brody*
- P79. Determinants of Self-Concept in Patients With Gilles de la Tourette Syndrome in Late Adolescence** *Paola R. Silvestri, Flavia Chiarotti, Valentina Baglioni, Valeria Neri, Francesco Cardona, Andrea E. Cavanna*
- P80. The Impact of Computerized Working Memory Training in Healthy Older Adults: A Multi-Site, Randomized Controlled Trial** *Sharon Simon, Erich Tusch, Krister Håkansson, Abdul Mohammed, Kirk Daffner*
- P81. Stimulus-Driven Orienting Response and Impulsivity Across Healthy and Psychopathological Populations** *Alessio Simonetti, Marijn Lijffit, David B. Arciniegas, Alan C. Swann*
- P82. Decreased Antipsychotic Dose Requirements After Bithalamic Infarcts in a Patient With Chronic Schizophrenia** *Elizabeth Sumner, Nabil Ali*
- P83. Delirium Superimposed on Paranoia and Cognitive Impairment in a Patient With Frontal Glioblastoma** *Daniel Talmasov, Fremonta L. Meyer*
- P84. Intracranial Hemorrhage Presenting as Depression in the Emergency Department** *Kristina Thurin, Michel Medina, Joan Roig Llesuy, Joseph Cooper*
- P85. Characteristics of Chinese-English Bilingual Dyslexia in Right Occipito-Temporal Lesion** *Simon Kang Seng TING, Pei Shi CHIA, Yiong Huak CHAN, Kevin Jun Hong KWEK, Wilnard TAN, Shahul HAMEED, Eng-King TAN*
- P86. Neuropsychiatric Symptoms and Criminal Behavior Following Deep Brain Stimulation for Parkinson's Disease: A Case Report Demonstrating Legal and Ethical Considerations When Patients Adjust Stimulator Settings** *Emily A. Troyer, Daniel Lee, Mark Wright*
- P87. Neuropsychological Testing in a Case of Voltage Gated Potassium Channel (VGKC) Antibody Limbic Encephalitis** *Jacqueline Vanderburgh, Katherine Brownlowe*
- P88. Decisional Impulsivity and the Associative-Limbic Subthalamic Nucleus in Obsessive Compulsive Disorder: Subthalamic Stimulation and Functional Connectivity** *Valerie Voon, Fabien Droux, Laurel Morris, Stephan Chabardes, Thierry Bougerol, Olivier David, Paul Krack, Mircea Polosan*
- P89. Neuropsychiatric Symptoms as Predictors of Progression to the Early Clinical Stages of Alzheimer Disease** *Golnaz Yadollahikholes, Luis A. Alvarado, Alok Kumar Dwivedi, Michael Escamilla, Ricardo Salazar*

- P90. The Efficacy of Aversive Conditioning for the Treatment of Severe Self-Injurious and Assaultive Behaviors** *Golnaz Yadollahikholes, Nathan Blenkush, Michael Cameron, Miles Cunningham*
- P91. The Effect of Neuropsychiatric Symptoms in the Development of MCI among Cognitively Normal Adults Carrying APOE ε4 Allele** *Golnaz Yadollahikholes, Christopher Dadoo, Alok Kumar Dwivedi, Michael Escamilla, Ricardo Salazar*
- P92. Resolution of Olfactory Hallucination With Nasal Congestion** *Al-Mounawara A. Yaya, Sarwar Haider, Alan R. Hirsch*
- P93. A Hand Across the Aisle: Leveraging Multiple Sclerosis to Improve Treatment of Schizophrenia** *Taylor Young, Radhika Natarajan, Xiaoduo Fan*

### CORRECTION

In Figure 4 of the article “Effect of High-Frequency Transcranial Magnetic Stimulation on Craving in Substance Use Disorder: A Meta-Analysis,” by Rituparna Maiti, M.D., et al. (*J Neuropsychiatry Clin Neurosci* 2017; 29:160–171, <https://doi.org/10.1176/appi.neuropsych.16040065>), the graphic representation of the two Amiaz et al. (2009) studies does not correspond with the data for Hedge’s *g*, the associated 95% confidence intervals, and the weights assigned to the studies. Readers should refer to Figure 2 for the correct graphic representation of data from these studies.
